# Supplementary material
Source: ML conference proceedings conference paper supplement (https://openreview.net/forum?id=f4c4JtbHJ7B)

# Pixab\_CAM python implementation

October 5, 2021

## 1 Pixab-CAM visual explanation map

### 1.1 Setup

```
[1]: import numpy as np
import matplotlib.pyplot as plt
import matplotlib.cm as cm
import tensorflow as tf
import skimage.io
import skimage.transform
import requests
from PIL import Image
from io import BytesIO
import os
from itertools import combinations_with_replacement
```

### 1.2 Prepare the pretrained model and the elements to create a visual explanation map

You can change these to another model.

```
[2]: ## Black box model pretrained on the ImageNet
model_builder = tf.keras.applications.inception_v3.InceptionV3
decode_predictions = tf.keras.applications.inception_v3.decode_predictions
model = model_builder(weights="imagenet")

## You can get "last convolution layer" & "classifier layer" & "input size" from
→ ".summary()"
print(model.summary())
last_conv_layer_name = "mixed10"
classifier_layer_names = ["avg_pool", "predictions"]
input_size = (299, 299)
```

Model: "inception\_v3"

```
-----
-----
Layer (type)                Output Shape          Param #      Connected to
=====
```

```

=====
input_1 (InputLayer)          [(None, 299, 299, 3) 0
-----
conv2d (Conv2D)                (None, 149, 149, 32) 864      input_1[0][0]
-----
batch_normalization (BatchNorma (None, 149, 149, 32) 96      conv2d[0][0]
-----
activation (Activation)        (None, 149, 149, 32) 0
batch_normalization[0][0]
-----
conv2d_1 (Conv2D)              (None, 147, 147, 32) 9216
activation[0][0]
-----
batch_normalization_1 (BatchNor (None, 147, 147, 32) 96      conv2d_1[0][0]
-----
activation_1 (Activation)      (None, 147, 147, 32) 0
batch_normalization_1[0][0]
-----
conv2d_2 (Conv2D)              (None, 147, 147, 64) 18432
activation_1[0][0]
-----
batch_normalization_2 (BatchNor (None, 147, 147, 64) 192      conv2d_2[0][0]
-----
activation_2 (Activation)      (None, 147, 147, 64) 0
batch_normalization_2[0][0]
-----
max_pooling2d (MaxPooling2D)   (None, 73, 73, 64) 0
activation_2[0][0]
-----
conv2d_3 (Conv2D)              (None, 73, 73, 80) 5120
max_pooling2d[0][0]
-----
batch_normalization_3 (BatchNor (None, 73, 73, 80) 240      conv2d_3[0][0]
-----
activation_3 (Activation)      (None, 73, 73, 80) 0

```

```

batch_normalization_3[0][0]

-----

conv2d_4 (Conv2D)          (None, 71, 71, 192)  138240
activation_3[0][0]

-----

batch_normalization_4 (BatchNor (None, 71, 71, 192)  576          conv2d_4[0][0]

-----

activation_4 (Activation)    (None, 71, 71, 192)  0
batch_normalization_4[0][0]

-----

max_pooling2d_1 (MaxPooling2D) (None, 35, 35, 192)  0
activation_4[0][0]

-----

conv2d_8 (Conv2D)          (None, 35, 35, 64)   12288
max_pooling2d_1[0][0]

-----

batch_normalization_8 (BatchNor (None, 35, 35, 64)   192          conv2d_8[0][0]

-----

activation_8 (Activation)    (None, 35, 35, 64)   0
batch_normalization_8[0][0]

-----

conv2d_6 (Conv2D)          (None, 35, 35, 48)   9216
max_pooling2d_1[0][0]

-----

conv2d_9 (Conv2D)          (None, 35, 35, 96)   55296
activation_8[0][0]

-----

batch_normalization_6 (BatchNor (None, 35, 35, 48)   144          conv2d_6[0][0]

-----

batch_normalization_9 (BatchNor (None, 35, 35, 96)   288          conv2d_9[0][0]

-----

activation_6 (Activation)    (None, 35, 35, 48)   0
batch_normalization_6[0][0]

-----

activation_9 (Activation)    (None, 35, 35, 96)   0

```

```

batch_normalization_9[0][0]
-----
-----
average_pooling2d (AveragePooli (None, 35, 35, 192) 0
max_pooling2d_1[0][0]
-----
-----
conv2d_5 (Conv2D) (None, 35, 35, 64) 12288
max_pooling2d_1[0][0]
-----
-----
conv2d_7 (Conv2D) (None, 35, 35, 64) 76800
activation_6[0][0]
-----
-----
conv2d_10 (Conv2D) (None, 35, 35, 96) 82944
activation_9[0][0]
-----
-----
conv2d_11 (Conv2D) (None, 35, 35, 32) 6144
average_pooling2d[0][0]
-----
-----
batch_normalization_5 (BatchNor (None, 35, 35, 64) 192 conv2d_5[0][0]
-----
-----
batch_normalization_7 (BatchNor (None, 35, 35, 64) 192 conv2d_7[0][0]
-----
-----
batch_normalization_10 (BatchNo (None, 35, 35, 96) 288 conv2d_10[0][0]
-----
-----
batch_normalization_11 (BatchNo (None, 35, 35, 32) 96 conv2d_11[0][0]
-----
-----
activation_5 (Activation) (None, 35, 35, 64) 0
batch_normalization_5[0][0]
-----
-----
activation_7 (Activation) (None, 35, 35, 64) 0
batch_normalization_7[0][0]
-----
-----
activation_10 (Activation) (None, 35, 35, 96) 0
batch_normalization_10[0][0]
-----
-----
activation_11 (Activation) (None, 35, 35, 32) 0

```

batch\_normalization\_11[0][0]

-----  
-----  
mixed0 (Concatenate) (None, 35, 35, 256) 0  
activation\_5[0][0]  
activation\_7[0][0]  
activation\_10[0][0]  
activation\_11[0][0]  
-----

-----  
conv2d\_15 (Conv2D) (None, 35, 35, 64) 16384 mixed0[0][0]  
-----

-----  
batch\_normalization\_15 (BatchNo (None, 35, 35, 64) 192 conv2d\_15[0][0]  
-----

-----  
activation\_15 (Activation) (None, 35, 35, 64) 0  
batch\_normalization\_15[0][0]  
-----

-----  
conv2d\_13 (Conv2D) (None, 35, 35, 48) 12288 mixed0[0][0]  
-----

-----  
conv2d\_16 (Conv2D) (None, 35, 35, 96) 55296  
activation\_15[0][0]  
-----

-----  
batch\_normalization\_13 (BatchNo (None, 35, 35, 48) 144 conv2d\_13[0][0]  
-----

-----  
batch\_normalization\_16 (BatchNo (None, 35, 35, 96) 288 conv2d\_16[0][0]  
-----

-----  
activation\_13 (Activation) (None, 35, 35, 48) 0  
batch\_normalization\_13[0][0]  
-----

-----  
activation\_16 (Activation) (None, 35, 35, 96) 0  
batch\_normalization\_16[0][0]  
-----

-----  
average\_pooling2d\_1 (AveragePoo (None, 35, 35, 256) 0 mixed0[0][0]  
-----

-----  
conv2d\_12 (Conv2D) (None, 35, 35, 64) 16384 mixed0[0][0]  
-----

-----  
conv2d\_14 (Conv2D) (None, 35, 35, 64) 76800  
-----

```

activation_13[0][0]
-----
-----
conv2d_17 (Conv2D)          (None, 35, 35, 96)    82944
activation_16[0][0]
-----
-----
conv2d_18 (Conv2D)          (None, 35, 35, 64)    16384
average_pooling2d_1[0][0]
-----
-----
batch_normalization_12 (BatchNo (None, 35, 35, 64)    192          conv2d_12[0][0]
-----
-----
batch_normalization_14 (BatchNo (None, 35, 35, 64)    192          conv2d_14[0][0]
-----
-----
batch_normalization_17 (BatchNo (None, 35, 35, 96)    288          conv2d_17[0][0]
-----
-----
batch_normalization_18 (BatchNo (None, 35, 35, 64)    192          conv2d_18[0][0]
-----
-----
activation_12 (Activation)    (None, 35, 35, 64)    0
batch_normalization_12[0][0]
-----
-----
activation_14 (Activation)    (None, 35, 35, 64)    0
batch_normalization_14[0][0]
-----
-----
activation_17 (Activation)    (None, 35, 35, 96)    0
batch_normalization_17[0][0]
-----
-----
activation_18 (Activation)    (None, 35, 35, 64)    0
batch_normalization_18[0][0]
-----
-----
mixed1 (Concatenate)         (None, 35, 35, 288)   0
activation_12[0][0]
activation_14[0][0]
activation_17[0][0]
activation_18[0][0]
-----
-----
conv2d_22 (Conv2D)          (None, 35, 35, 64)    18432          mixed1[0][0]
-----

```

```

-----
batch_normalization_22 (BatchNo (None, 35, 35, 64) 192 conv2d_22[0] [0]
-----
-----
activation_22 (Activation) (None, 35, 35, 64) 0
batch_normalization_22[0] [0]
-----
-----
conv2d_20 (Conv2D) (None, 35, 35, 48) 13824 mixed1[0] [0]
-----
-----
conv2d_23 (Conv2D) (None, 35, 35, 96) 55296
activation_22[0] [0]
-----
-----
batch_normalization_20 (BatchNo (None, 35, 35, 48) 144 conv2d_20[0] [0]
-----
-----
batch_normalization_23 (BatchNo (None, 35, 35, 96) 288 conv2d_23[0] [0]
-----
-----
activation_20 (Activation) (None, 35, 35, 48) 0
batch_normalization_20[0] [0]
-----
-----
activation_23 (Activation) (None, 35, 35, 96) 0
batch_normalization_23[0] [0]
-----
-----
average_pooling2d_2 (AveragePoo (None, 35, 35, 288) 0 mixed1[0] [0]
-----
-----
conv2d_19 (Conv2D) (None, 35, 35, 64) 18432 mixed1[0] [0]
-----
-----
conv2d_21 (Conv2D) (None, 35, 35, 64) 76800
activation_20[0] [0]
-----
-----
conv2d_24 (Conv2D) (None, 35, 35, 96) 82944
activation_23[0] [0]
-----
-----
conv2d_25 (Conv2D) (None, 35, 35, 64) 18432
average_pooling2d_2[0] [0]
-----
-----
batch_normalization_19 (BatchNo (None, 35, 35, 64) 192 conv2d_19[0] [0]

```

```

-----
batch_normalization_21 (BatchNo (None, 35, 35, 64) 192 conv2d_21[0][0]
-----
batch_normalization_24 (BatchNo (None, 35, 35, 96) 288 conv2d_24[0][0]
-----
batch_normalization_25 (BatchNo (None, 35, 35, 64) 192 conv2d_25[0][0]
-----
activation_19 (Activation) (None, 35, 35, 64) 0
batch_normalization_19[0][0]
-----
activation_21 (Activation) (None, 35, 35, 64) 0
batch_normalization_21[0][0]
-----
activation_24 (Activation) (None, 35, 35, 96) 0
batch_normalization_24[0][0]
-----
activation_25 (Activation) (None, 35, 35, 64) 0
batch_normalization_25[0][0]
-----
mixed2 (Concatenate) (None, 35, 35, 288) 0
activation_19[0][0]
activation_21[0][0]
activation_24[0][0]
activation_25[0][0]
-----
conv2d_27 (Conv2D) (None, 35, 35, 64) 18432 mixed2[0][0]
-----
batch_normalization_27 (BatchNo (None, 35, 35, 64) 192 conv2d_27[0][0]
-----
activation_27 (Activation) (None, 35, 35, 64) 0
batch_normalization_27[0][0]
-----
conv2d_28 (Conv2D) (None, 35, 35, 96) 55296
activation_27[0][0]
-----

```



|                                 |                     |        |                 |
|---------------------------------|---------------------|--------|-----------------|
| batch_normalization_28 (BatchNo | (None, 35, 35, 96)  | 288    | conv2d_28[0][0] |
| -----                           |                     |        |                 |
| activation_28 (Activation)      | (None, 35, 35, 96)  | 0      |                 |
| batch_normalization_28[0][0]    |                     |        |                 |
| -----                           |                     |        |                 |
| conv2d_26 (Conv2D)              | (None, 17, 17, 384) | 995328 | mixed2[0][0]    |
| -----                           |                     |        |                 |
| conv2d_29 (Conv2D)              | (None, 17, 17, 96)  | 82944  |                 |
| activation_28[0][0]             |                     |        |                 |
| -----                           |                     |        |                 |
| batch_normalization_26 (BatchNo | (None, 17, 17, 384) | 1152   | conv2d_26[0][0] |
| -----                           |                     |        |                 |
| batch_normalization_29 (BatchNo | (None, 17, 17, 96)  | 288    | conv2d_29[0][0] |
| -----                           |                     |        |                 |
| activation_26 (Activation)      | (None, 17, 17, 384) | 0      |                 |
| batch_normalization_26[0][0]    |                     |        |                 |
| -----                           |                     |        |                 |
| activation_29 (Activation)      | (None, 17, 17, 96)  | 0      |                 |
| batch_normalization_29[0][0]    |                     |        |                 |
| -----                           |                     |        |                 |
| max_pooling2d_2 (MaxPooling2D)  | (None, 17, 17, 288) | 0      | mixed2[0][0]    |
| -----                           |                     |        |                 |
| mixed3 (Concatenate)            | (None, 17, 17, 768) | 0      |                 |
| activation_26[0][0]             |                     |        |                 |
| activation_29[0][0]             |                     |        |                 |
| max_pooling2d_2[0][0]           |                     |        |                 |
| -----                           |                     |        |                 |
| conv2d_34 (Conv2D)              | (None, 17, 17, 128) | 98304  | mixed3[0][0]    |
| -----                           |                     |        |                 |
| batch_normalization_34 (BatchNo | (None, 17, 17, 128) | 384    | conv2d_34[0][0] |
| -----                           |                     |        |                 |
| activation_34 (Activation)      | (None, 17, 17, 128) | 0      |                 |
| batch_normalization_34[0][0]    |                     |        |                 |
| -----                           |                     |        |                 |
| conv2d_35 (Conv2D)              | (None, 17, 17, 128) | 114688 |                 |

```

activation_34[0][0]
-----
batch_normalization_35 (BatchNo (None, 17, 17, 128) 384 conv2d_35[0][0]
-----
activation_35 (Activation) (None, 17, 17, 128) 0
batch_normalization_35[0][0]
-----
conv2d_31 (Conv2D) (None, 17, 17, 128) 98304 mixed3[0][0]
-----
conv2d_36 (Conv2D) (None, 17, 17, 128) 114688
activation_35[0][0]
-----
batch_normalization_31 (BatchNo (None, 17, 17, 128) 384 conv2d_31[0][0]
-----
batch_normalization_36 (BatchNo (None, 17, 17, 128) 384 conv2d_36[0][0]
-----
activation_31 (Activation) (None, 17, 17, 128) 0
batch_normalization_31[0][0]
-----
activation_36 (Activation) (None, 17, 17, 128) 0
batch_normalization_36[0][0]
-----
conv2d_32 (Conv2D) (None, 17, 17, 128) 114688
activation_31[0][0]
-----
conv2d_37 (Conv2D) (None, 17, 17, 128) 114688
activation_36[0][0]
-----
batch_normalization_32 (BatchNo (None, 17, 17, 128) 384 conv2d_32[0][0]
-----
batch_normalization_37 (BatchNo (None, 17, 17, 128) 384 conv2d_37[0][0]
-----
activation_32 (Activation) (None, 17, 17, 128) 0
batch_normalization_32[0][0]
-----

```

```

-----
activation_37 (Activation)      (None, 17, 17, 128)  0
batch_normalization_37[0][0]
-----
-----
average_pooling2d_3 (AveragePoo (None, 17, 17, 768)  0          mixed3[0][0]
-----
-----
conv2d_30 (Conv2D)             (None, 17, 17, 192)  147456      mixed3[0][0]
-----
-----
conv2d_33 (Conv2D)             (None, 17, 17, 192)  172032
activation_32[0][0]
-----
-----
conv2d_38 (Conv2D)             (None, 17, 17, 192)  172032
activation_37[0][0]
-----
-----
conv2d_39 (Conv2D)             (None, 17, 17, 192)  147456
average_pooling2d_3[0][0]
-----
-----
batch_normalization_30 (BatchNo (None, 17, 17, 192)  576          conv2d_30[0][0]
-----
-----
batch_normalization_33 (BatchNo (None, 17, 17, 192)  576          conv2d_33[0][0]
-----
-----
batch_normalization_38 (BatchNo (None, 17, 17, 192)  576          conv2d_38[0][0]
-----
-----
batch_normalization_39 (BatchNo (None, 17, 17, 192)  576          conv2d_39[0][0]
-----
-----
activation_30 (Activation)      (None, 17, 17, 192)  0
batch_normalization_30[0][0]
-----
-----
activation_33 (Activation)      (None, 17, 17, 192)  0
batch_normalization_33[0][0]
-----
-----
activation_38 (Activation)      (None, 17, 17, 192)  0
batch_normalization_38[0][0]
-----
-----
activation_39 (Activation)      (None, 17, 17, 192)  0

```

batch\_normalization\_39[0][0]

-----  
-----  
mixed4 (Concatenate) (None, 17, 17, 768) 0  
activation\_30[0][0]  
activation\_33[0][0]  
activation\_38[0][0]  
activation\_39[0][0]  
-----

-----  
conv2d\_44 (Conv2D) (None, 17, 17, 160) 122880 mixed4[0][0]  
-----

-----  
batch\_normalization\_44 (BatchNo (None, 17, 17, 160) 480 conv2d\_44[0][0]  
-----

-----  
activation\_44 (Activation) (None, 17, 17, 160) 0  
batch\_normalization\_44[0][0]  
-----

-----  
conv2d\_45 (Conv2D) (None, 17, 17, 160) 179200  
activation\_44[0][0]  
-----

-----  
batch\_normalization\_45 (BatchNo (None, 17, 17, 160) 480 conv2d\_45[0][0]  
-----

-----  
activation\_45 (Activation) (None, 17, 17, 160) 0  
batch\_normalization\_45[0][0]  
-----

-----  
conv2d\_41 (Conv2D) (None, 17, 17, 160) 122880 mixed4[0][0]  
-----

-----  
conv2d\_46 (Conv2D) (None, 17, 17, 160) 179200  
activation\_45[0][0]  
-----

-----  
batch\_normalization\_41 (BatchNo (None, 17, 17, 160) 480 conv2d\_41[0][0]  
-----

-----  
batch\_normalization\_46 (BatchNo (None, 17, 17, 160) 480 conv2d\_46[0][0]  
-----

-----  
activation\_41 (Activation) (None, 17, 17, 160) 0  
batch\_normalization\_41[0][0]  
-----  
-----

|                                 |                     |        |                 |
|---------------------------------|---------------------|--------|-----------------|
| activation_46 (Activation)      | (None, 17, 17, 160) | 0      |                 |
| batch_normalization_46[0][0]    |                     |        |                 |
| -----                           |                     |        |                 |
| conv2d_42 (Conv2D)              | (None, 17, 17, 160) | 179200 |                 |
| activation_41[0][0]             |                     |        |                 |
| -----                           |                     |        |                 |
| conv2d_47 (Conv2D)              | (None, 17, 17, 160) | 179200 |                 |
| activation_46[0][0]             |                     |        |                 |
| -----                           |                     |        |                 |
| batch_normalization_42 (BatchNo | (None, 17, 17, 160) | 480    | conv2d_42[0][0] |
| -----                           |                     |        |                 |
| batch_normalization_47 (BatchNo | (None, 17, 17, 160) | 480    | conv2d_47[0][0] |
| -----                           |                     |        |                 |
| activation_42 (Activation)      | (None, 17, 17, 160) | 0      |                 |
| batch_normalization_42[0][0]    |                     |        |                 |
| -----                           |                     |        |                 |
| activation_47 (Activation)      | (None, 17, 17, 160) | 0      |                 |
| batch_normalization_47[0][0]    |                     |        |                 |
| -----                           |                     |        |                 |
| average_pooling2d_4 (AveragePoo | (None, 17, 17, 768) | 0      | mixed4[0][0]    |
| -----                           |                     |        |                 |
| conv2d_40 (Conv2D)              | (None, 17, 17, 192) | 147456 | mixed4[0][0]    |
| -----                           |                     |        |                 |
| conv2d_43 (Conv2D)              | (None, 17, 17, 192) | 215040 |                 |
| activation_42[0][0]             |                     |        |                 |
| -----                           |                     |        |                 |
| conv2d_48 (Conv2D)              | (None, 17, 17, 192) | 215040 |                 |
| activation_47[0][0]             |                     |        |                 |
| -----                           |                     |        |                 |
| conv2d_49 (Conv2D)              | (None, 17, 17, 192) | 147456 |                 |
| average_pooling2d_4[0][0]       |                     |        |                 |
| -----                           |                     |        |                 |
| batch_normalization_40 (BatchNo | (None, 17, 17, 192) | 576    | conv2d_40[0][0] |
| -----                           |                     |        |                 |
| batch_normalization_43 (BatchNo | (None, 17, 17, 192) | 576    | conv2d_43[0][0] |

```

-----
batch_normalization_48 (BatchNo (None, 17, 17, 192) 576 conv2d_48[0] [0]
-----
batch_normalization_49 (BatchNo (None, 17, 17, 192) 576 conv2d_49[0] [0]
-----
activation_40 (Activation) (None, 17, 17, 192) 0
batch_normalization_40[0] [0]
-----
activation_43 (Activation) (None, 17, 17, 192) 0
batch_normalization_43[0] [0]
-----
activation_48 (Activation) (None, 17, 17, 192) 0
batch_normalization_48[0] [0]
-----
activation_49 (Activation) (None, 17, 17, 192) 0
batch_normalization_49[0] [0]
-----
mixed5 (Concatenate) (None, 17, 17, 768) 0
activation_40[0] [0]
activation_43[0] [0]
activation_48[0] [0]
activation_49[0] [0]
-----
conv2d_54 (Conv2D) (None, 17, 17, 160) 122880 mixed5[0] [0]
-----
batch_normalization_54 (BatchNo (None, 17, 17, 160) 480 conv2d_54[0] [0]
-----
activation_54 (Activation) (None, 17, 17, 160) 0
batch_normalization_54[0] [0]
-----
conv2d_55 (Conv2D) (None, 17, 17, 160) 179200
activation_54[0] [0]
-----
batch_normalization_55 (BatchNo (None, 17, 17, 160) 480 conv2d_55[0] [0]
-----

```

```

activation_55 (Activation)      (None, 17, 17, 160)  0
batch_normalization_55[0][0]

-----

conv2d_51 (Conv2D)              (None, 17, 17, 160)  122880      mixed5[0][0]

-----

conv2d_56 (Conv2D)              (None, 17, 17, 160)  179200
activation_55[0][0]

-----

batch_normalization_51 (BatchNo (None, 17, 17, 160)  480      conv2d_51[0][0]

-----

batch_normalization_56 (BatchNo (None, 17, 17, 160)  480      conv2d_56[0][0]

-----

activation_51 (Activation)      (None, 17, 17, 160)  0
batch_normalization_51[0][0]

-----

activation_56 (Activation)      (None, 17, 17, 160)  0
batch_normalization_56[0][0]

-----

conv2d_52 (Conv2D)              (None, 17, 17, 160)  179200
activation_51[0][0]

-----

conv2d_57 (Conv2D)              (None, 17, 17, 160)  179200
activation_56[0][0]

-----

batch_normalization_52 (BatchNo (None, 17, 17, 160)  480      conv2d_52[0][0]

-----

batch_normalization_57 (BatchNo (None, 17, 17, 160)  480      conv2d_57[0][0]

-----

activation_52 (Activation)      (None, 17, 17, 160)  0
batch_normalization_52[0][0]

-----

activation_57 (Activation)      (None, 17, 17, 160)  0
batch_normalization_57[0][0]

-----

average_pooling2d_5 (AveragePoo (None, 17, 17, 768)  0      mixed5[0][0]

```

|                                 |                     |        |                 |
|---------------------------------|---------------------|--------|-----------------|
| conv2d_50 (Conv2D)              | (None, 17, 17, 192) | 147456 | mixed5[0][0]    |
| conv2d_53 (Conv2D)              | (None, 17, 17, 192) | 215040 |                 |
| activation_52[0][0]             |                     |        |                 |
| conv2d_58 (Conv2D)              | (None, 17, 17, 192) | 215040 |                 |
| activation_57[0][0]             |                     |        |                 |
| conv2d_59 (Conv2D)              | (None, 17, 17, 192) | 147456 |                 |
| average_pooling2d_5[0][0]       |                     |        |                 |
| batch_normalization_50 (BatchNo | (None, 17, 17, 192) | 576    | conv2d_50[0][0] |
| batch_normalization_53 (BatchNo | (None, 17, 17, 192) | 576    | conv2d_53[0][0] |
| batch_normalization_58 (BatchNo | (None, 17, 17, 192) | 576    | conv2d_58[0][0] |
| batch_normalization_59 (BatchNo | (None, 17, 17, 192) | 576    | conv2d_59[0][0] |
| activation_50 (Activation)      | (None, 17, 17, 192) | 0      |                 |
| batch_normalization_50[0][0]    |                     |        |                 |
| activation_53 (Activation)      | (None, 17, 17, 192) | 0      |                 |
| batch_normalization_53[0][0]    |                     |        |                 |
| activation_58 (Activation)      | (None, 17, 17, 192) | 0      |                 |
| batch_normalization_58[0][0]    |                     |        |                 |
| activation_59 (Activation)      | (None, 17, 17, 192) | 0      |                 |
| batch_normalization_59[0][0]    |                     |        |                 |
| mixed6 (Concatenate)            | (None, 17, 17, 768) | 0      |                 |
| activation_50[0][0]             |                     |        |                 |
| activation_53[0][0]             |                     |        |                 |



```

activation_58[0][0]
activation_59[0][0]
-----
-----
conv2d_64 (Conv2D)          (None, 17, 17, 192)  147456      mixed6[0][0]
-----
-----
batch_normalization_64 (BatchNo (None, 17, 17, 192)  576          conv2d_64[0][0]
-----
-----
activation_64 (Activation)   (None, 17, 17, 192)  0
batch_normalization_64[0][0]
-----
-----
conv2d_65 (Conv2D)          (None, 17, 17, 192)  258048
activation_64[0][0]
-----
-----
batch_normalization_65 (BatchNo (None, 17, 17, 192)  576          conv2d_65[0][0]
-----
-----
activation_65 (Activation)   (None, 17, 17, 192)  0
batch_normalization_65[0][0]
-----
-----
conv2d_61 (Conv2D)          (None, 17, 17, 192)  147456      mixed6[0][0]
-----
-----
conv2d_66 (Conv2D)          (None, 17, 17, 192)  258048
activation_65[0][0]
-----
-----
batch_normalization_61 (BatchNo (None, 17, 17, 192)  576          conv2d_61[0][0]
-----
-----
batch_normalization_66 (BatchNo (None, 17, 17, 192)  576          conv2d_66[0][0]
-----
-----
activation_61 (Activation)   (None, 17, 17, 192)  0
batch_normalization_61[0][0]
-----
-----
activation_66 (Activation)   (None, 17, 17, 192)  0
batch_normalization_66[0][0]
-----
-----
conv2d_62 (Conv2D)          (None, 17, 17, 192)  258048
activation_61[0][0]

```

```

-----
conv2d_67 (Conv2D) (None, 17, 17, 192) 258048
activation_66[0][0]
-----
batch_normalization_62 (BatchNo (None, 17, 17, 192) 576 conv2d_62[0][0]
-----
batch_normalization_67 (BatchNo (None, 17, 17, 192) 576 conv2d_67[0][0]
-----
activation_62 (Activation) (None, 17, 17, 192) 0
batch_normalization_62[0][0]
-----
activation_67 (Activation) (None, 17, 17, 192) 0
batch_normalization_67[0][0]
-----
average_pooling2d_6 (AveragePoo (None, 17, 17, 768) 0 mixed6[0][0]
-----
conv2d_60 (Conv2D) (None, 17, 17, 192) 147456 mixed6[0][0]
-----
conv2d_63 (Conv2D) (None, 17, 17, 192) 258048
activation_62[0][0]
-----
conv2d_68 (Conv2D) (None, 17, 17, 192) 258048
activation_67[0][0]
-----
conv2d_69 (Conv2D) (None, 17, 17, 192) 147456
average_pooling2d_6[0][0]
-----
batch_normalization_60 (BatchNo (None, 17, 17, 192) 576 conv2d_60[0][0]
-----
batch_normalization_63 (BatchNo (None, 17, 17, 192) 576 conv2d_63[0][0]
-----
batch_normalization_68 (BatchNo (None, 17, 17, 192) 576 conv2d_68[0][0]
-----
batch_normalization_69 (BatchNo (None, 17, 17, 192) 576 conv2d_69[0][0]

```

```

-----
-----
activation_60 (Activation)      (None, 17, 17, 192)  0
batch_normalization_60[0][0]
-----
-----
activation_63 (Activation)      (None, 17, 17, 192)  0
batch_normalization_63[0][0]
-----
-----
activation_68 (Activation)      (None, 17, 17, 192)  0
batch_normalization_68[0][0]
-----
-----
activation_69 (Activation)      (None, 17, 17, 192)  0
batch_normalization_69[0][0]
-----
-----
mixed7 (Concatenate)           (None, 17, 17, 768)  0
activation_60[0][0]
activation_63[0][0]
activation_68[0][0]
activation_69[0][0]
-----
-----
conv2d_72 (Conv2D)              (None, 17, 17, 192)  147456      mixed7[0][0]
-----
-----
batch_normalization_72 (BatchNo (None, 17, 17, 192)  576      conv2d_72[0][0]
-----
-----
activation_72 (Activation)      (None, 17, 17, 192)  0
batch_normalization_72[0][0]
-----
-----
conv2d_73 (Conv2D)              (None, 17, 17, 192)  258048
activation_72[0][0]
-----
-----
batch_normalization_73 (BatchNo (None, 17, 17, 192)  576      conv2d_73[0][0]
-----
-----
activation_73 (Activation)      (None, 17, 17, 192)  0
batch_normalization_73[0][0]
-----
-----
conv2d_70 (Conv2D)              (None, 17, 17, 192)  147456      mixed7[0][0]
-----

```

```

-----
conv2d_74 (Conv2D)                (None, 17, 17, 192)  258048
activation_73[0][0]
-----
-----
batch_normalization_70 (BatchNo (None, 17, 17, 192)  576          conv2d_70[0][0]
-----
-----
batch_normalization_74 (BatchNo (None, 17, 17, 192)  576          conv2d_74[0][0]
-----
-----
activation_70 (Activation)         (None, 17, 17, 192)  0
batch_normalization_70[0][0]
-----
-----
activation_74 (Activation)         (None, 17, 17, 192)  0
batch_normalization_74[0][0]
-----
-----
conv2d_71 (Conv2D)                (None, 8, 8, 320)    552960
activation_70[0][0]
-----
-----
conv2d_75 (Conv2D)                (None, 8, 8, 192)    331776
activation_74[0][0]
-----
-----
batch_normalization_71 (BatchNo (None, 8, 8, 320)    960          conv2d_71[0][0]
-----
-----
batch_normalization_75 (BatchNo (None, 8, 8, 192)    576          conv2d_75[0][0]
-----
-----
activation_71 (Activation)         (None, 8, 8, 320)    0
batch_normalization_71[0][0]
-----
-----
activation_75 (Activation)         (None, 8, 8, 192)    0
batch_normalization_75[0][0]
-----
-----
max_pooling2d_3 (MaxPooling2D)    (None, 8, 8, 768)    0          mixed7[0][0]
-----
-----
mixed8 (Concatenate)              (None, 8, 8, 1280)   0
activation_71[0][0]
activation_75[0][0]
max_pooling2d_3[0][0]

```

|                                              |                   |         |                              |
|----------------------------------------------|-------------------|---------|------------------------------|
| conv2d_80 (Conv2D)                           | (None, 8, 8, 448) | 573440  | mixed8[0][0]                 |
| batch_normalization_80 (Batch Normalization) | (None, 8, 8, 448) | 1344    | conv2d_80[0][0]              |
| activation_80 (Activation)                   | (None, 8, 8, 448) | 0       | batch_normalization_80[0][0] |
| conv2d_77 (Conv2D)                           | (None, 8, 8, 384) | 491520  | mixed8[0][0]                 |
| conv2d_81 (Conv2D)                           | (None, 8, 8, 384) | 1548288 | activation_80[0][0]          |
| batch_normalization_77 (Batch Normalization) | (None, 8, 8, 384) | 1152    | conv2d_77[0][0]              |
| batch_normalization_81 (Batch Normalization) | (None, 8, 8, 384) | 1152    | conv2d_81[0][0]              |
| activation_77 (Activation)                   | (None, 8, 8, 384) | 0       | batch_normalization_77[0][0] |
| activation_81 (Activation)                   | (None, 8, 8, 384) | 0       | batch_normalization_81[0][0] |
| conv2d_78 (Conv2D)                           | (None, 8, 8, 384) | 442368  | activation_77[0][0]          |
| conv2d_79 (Conv2D)                           | (None, 8, 8, 384) | 442368  | activation_77[0][0]          |
| conv2d_82 (Conv2D)                           | (None, 8, 8, 384) | 442368  | activation_81[0][0]          |
| conv2d_83 (Conv2D)                           | (None, 8, 8, 384) | 442368  | activation_81[0][0]          |

```

-----
average_pooling2d_7 (AveragePool (None, 8, 8, 1280) 0 mixed8[0][0]
-----
-----
conv2d_76 (Conv2D) (None, 8, 8, 320) 409600 mixed8[0][0]
-----
-----
batch_normalization_78 (BatchNormal (None, 8, 8, 384) 1152 conv2d_78[0][0]
-----
-----
batch_normalization_79 (BatchNormal (None, 8, 8, 384) 1152 conv2d_79[0][0]
-----
-----
batch_normalization_82 (BatchNormal (None, 8, 8, 384) 1152 conv2d_82[0][0]
-----
-----
batch_normalization_83 (BatchNormal (None, 8, 8, 384) 1152 conv2d_83[0][0]
-----
-----
conv2d_84 (Conv2D) (None, 8, 8, 192) 245760
average_pooling2d_7[0][0]
-----
-----
batch_normalization_76 (BatchNormal (None, 8, 8, 320) 960 conv2d_76[0][0]
-----
-----
activation_78 (Activation) (None, 8, 8, 384) 0
batch_normalization_78[0][0]
-----
-----
activation_79 (Activation) (None, 8, 8, 384) 0
batch_normalization_79[0][0]
-----
-----
activation_82 (Activation) (None, 8, 8, 384) 0
batch_normalization_82[0][0]
-----
-----
activation_83 (Activation) (None, 8, 8, 384) 0
batch_normalization_83[0][0]
-----
-----
batch_normalization_84 (BatchNormal (None, 8, 8, 192) 576 conv2d_84[0][0]
-----
-----
activation_76 (Activation) (None, 8, 8, 320) 0
batch_normalization_76[0][0]
-----

```

```

-----
mixed9_0 (Concatenate)          (None, 8, 8, 768)    0
activation_78[0][0]
activation_79[0][0]
-----
-----
concatenate (Concatenate)       (None, 8, 8, 768)    0
activation_82[0][0]
activation_83[0][0]
-----
-----
activation_84 (Activation)       (None, 8, 8, 192)    0
batch_normalization_84[0][0]
-----
-----
mixed9 (Concatenate)            (None, 8, 8, 2048)   0
activation_76[0][0]
                                                                mixed9_0[0][0]
concatenate[0][0]
activation_84[0][0]
-----
-----
conv2d_89 (Conv2D)              (None, 8, 8, 448)    917504    mixed9[0][0]
-----
-----
batch_normalization_89 (BatchNo (None, 8, 8, 448)    1344    conv2d_89[0][0]
-----
-----
activation_89 (Activation)       (None, 8, 8, 448)    0
batch_normalization_89[0][0]
-----
-----
conv2d_86 (Conv2D)              (None, 8, 8, 384)    786432    mixed9[0][0]
-----
-----
conv2d_90 (Conv2D)              (None, 8, 8, 384)    1548288
activation_89[0][0]
-----
-----
batch_normalization_86 (BatchNo (None, 8, 8, 384)    1152    conv2d_86[0][0]
-----
-----
batch_normalization_90 (BatchNo (None, 8, 8, 384)    1152    conv2d_90[0][0]
-----
-----
activation_86 (Activation)       (None, 8, 8, 384)    0
batch_normalization_86[0][0]
-----

```

|                                              |                    |        |                 |
|----------------------------------------------|--------------------|--------|-----------------|
| activation_90 (Activation)                   | (None, 8, 8, 384)  | 0      |                 |
| batch_normalization_90[0][0]                 |                    |        |                 |
| conv2d_87 (Conv2D)                           | (None, 8, 8, 384)  | 442368 |                 |
| activation_86[0][0]                          |                    |        |                 |
| conv2d_88 (Conv2D)                           | (None, 8, 8, 384)  | 442368 |                 |
| activation_86[0][0]                          |                    |        |                 |
| conv2d_91 (Conv2D)                           | (None, 8, 8, 384)  | 442368 |                 |
| activation_90[0][0]                          |                    |        |                 |
| conv2d_92 (Conv2D)                           | (None, 8, 8, 384)  | 442368 |                 |
| activation_90[0][0]                          |                    |        |                 |
| average_pooling2d_8 (AveragePool)            | (None, 8, 8, 2048) | 0      | mixed9[0][0]    |
| conv2d_85 (Conv2D)                           | (None, 8, 8, 320)  | 655360 | mixed9[0][0]    |
| batch_normalization_87 (Batch Normalization) | (None, 8, 8, 384)  | 1152   | conv2d_87[0][0] |
| batch_normalization_88 (Batch Normalization) | (None, 8, 8, 384)  | 1152   | conv2d_88[0][0] |
| batch_normalization_91 (Batch Normalization) | (None, 8, 8, 384)  | 1152   | conv2d_91[0][0] |
| batch_normalization_92 (Batch Normalization) | (None, 8, 8, 384)  | 1152   | conv2d_92[0][0] |
| conv2d_93 (Conv2D)                           | (None, 8, 8, 192)  | 393216 |                 |
| average_pooling2d_8[0][0]                    |                    |        |                 |
| batch_normalization_85 (Batch Normalization) | (None, 8, 8, 320)  | 960    | conv2d_85[0][0] |
| activation_87 (Activation)                   | (None, 8, 8, 384)  | 0      |                 |
| batch_normalization_87[0][0]                 |                    |        |                 |



```

-----
-----
activation_88 (Activation)      (None, 8, 8, 384)    0
batch_normalization_88[0][0]
-----
-----
activation_91 (Activation)      (None, 8, 8, 384)    0
batch_normalization_91[0][0]
-----
-----
activation_92 (Activation)      (None, 8, 8, 384)    0
batch_normalization_92[0][0]
-----
-----
batch_normalization_93 (BatchNo (None, 8, 8, 192)    576          conv2d_93[0][0]
-----
-----
activation_85 (Activation)      (None, 8, 8, 320)    0
batch_normalization_85[0][0]
-----
-----
mixed9_1 (Concatenate)         (None, 8, 8, 768)    0
activation_87[0][0]
activation_88[0][0]
-----
-----
concatenate_1 (Concatenate)    (None, 8, 8, 768)    0
activation_91[0][0]
activation_92[0][0]
-----
-----
activation_93 (Activation)      (None, 8, 8, 192)    0
batch_normalization_93[0][0]
-----
-----
mixed10 (Concatenate)          (None, 8, 8, 2048)   0
activation_85[0][0]
mixed9_1[0][0]
concatenate_1[0][0]
activation_93[0][0]
-----
-----
avg_pool (GlobalAveragePooling2 (None, 2048)          0          mixed10[0][0]
-----
-----
predictions (Dense)            (None, 1000)         2049000    avg_pool[0][0]
=====
=====

```

Total params: 23,851,784  
Trainable params: 23,817,352  
Non-trainable params: 34,432

---

None

### 1.3 Prepare image

You can change it to any image you want.

```
[3]: ## Path of Input Image  
dir_path = './examples'  
img_name = os.listdir('./examples')[3]  
img_path = dir_path + '/' + img_name
```

```
[4]: ## Prepare Input Image  
Xi = skimage.io.imread(img_path)  
origianl_img = Xi  
origianl_img_size = origianl_img.shape  
print(origianl_img_size)  
  
## Reshape input image  
Xi = skimage.transform.resize(Xi, input_size)  
print(Xi.shape)  
Xi = (Xi - 0.5) * 2    # Inception pre-processing
```

(486, 729, 3)

(299, 299, 3)

```
[5]: ## Visualization input image  
fig, ax = plt.subplots(nrows=1, ncols=1, sharex=True, sharey=True)  
skimage.io.imshow(Xi/2 + 0.5)    # Show image before inception preprocessing  
ax.axis('off')  
plt.show()
```

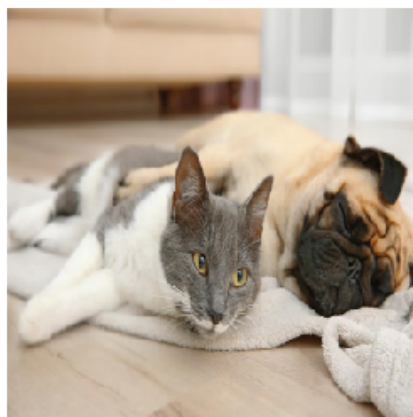

```
[6]: ## Get array of input image
img_array = Xi[np.newaxis, :, :, :]
img_array = img_array.astype('float32')

## Prediction input image & Print what the top predicted class is
preds = model.predict(img_array)
print(decode_predictions(preds)[0])    # Top 5 classes
interested_class_order = 0    # The class with the 'interested_class_order'-th
    → highest confidence

## Index of the class of interest
top_pred_classes_index = preds[0].argsort()[-5:][::-1]
top_pred_classes_index    # Index of top 5 classes
interested_class_index = top_pred_classes_index[interested_class_order]    #
    → Index of the class of interest
```

```
[('n02110958', 'pug', 0.15104042), ('n02123597', 'Siamese_cat', 0.061423033),
('n02808304', 'bath_towel', 0.05276003), ('n02124075', 'Egyptian_cat',
0.031069592), ('n02108422', 'bull_mastiff', 0.014700278)]
```

## 1.4 The Pixab-CAM algorithm

```
[7]: ## Get index for interested class
cls = interested_class_index

## Create a model that maps the input image to the activations of the last conv
    → layer
last_conv_layer = model.get_layer(last_conv_layer_name)
last_conv_layer_model = tf.keras.Model(model.inputs, last_conv_layer.output)

## Create a model that maps the activations of the last conv layer to the final
    → class predictions
classifier_input = tf.keras.Input(shape=last_conv_layer.output.shape[1:])
x = classifier_input
for layer_name in classifier_layer_names:
    x = model.get_layer(layer_name)(x)
classifier_model = tf.keras.Model(classifier_input, x)

## Compute the gradient of the top predicted class for our input image with
    → respect to the activations of the last conv layer
with tf.GradientTape() as tape:
    # Compute activations of the last conv layer and make the tape watch it
    last_conv_layer_output = last_conv_layer_model(img_array)
    tape.watch(last_conv_layer_output)
```

```

# Compute class predictions
preds = classifier_model(last_conv_layer_output)
top_pred_index = tf.argmax(preds[0])
#top_class_channel = preds[:, top_pred_index]
top_class_channel = preds[:, cls]

last_conv_layer_output = last_conv_layer_output.numpy()

## Activation Tensor
activations = last_conv_layer_output.copy()
last_layer_activation = activations[-1]

activation = last_layer_activation
activation = np.expand_dims(activation, axis=0)

## window_size = 1 X 1
# ablation box (deletion perspective)
inv_identity = (1 - np.identity(last_layer_activation.shape[0] *
    ↳last_layer_activation.shape[1]))
inv_identity = inv_identity.reshape(last_layer_activation.shape[0] *
    ↳last_layer_activation.shape[1], last_layer_activation.shape[0],
    ↳last_layer_activation.shape[1])

activation_tensor = activation * inv_identity[..., np.newaxis]
prediction = classifier_model(activation_tensor)
values = prediction[:, cls].numpy().reshape(last_layer_activation.shape[0],
    ↳last_layer_activation.shape[0])
values1 = values

# reverse ablation box (preservation perspective)
identity = 1 - inv_identity

activation_tensor = activation * identity[..., np.newaxis]
prediction = classifier_model(activation_tensor)
values = prediction[:, cls].numpy().reshape(last_layer_activation.shape[0],
    ↳last_layer_activation.shape[0])
reverse_values1 = values

## window_size = 2 X 1
# ablation box (deletion perspective)
window_size = 2 ; padding = 1
inv_identity = (1 - np.identity((last_layer_activation.shape[0] + (2 * padding))
    ↳* (last_layer_activation.shape[1] + (2 * padding))))
inv_identity = inv_identity.reshape((last_layer_activation.shape[0] + (2 *
    ↳padding)) * (last_layer_activation.shape[1] + (2 * padding)),
    ↳(last_layer_activation.shape[0] + (2 * padding)), (last_layer_activation.
    ↳shape[1] + (2 * padding)))

```

```

index_matrix = np.arange((activation.shape[1] + (2 * padding)) * (activation.
    ↳shape[2] + (2 * padding))).reshape((activation.shape[1] + (2 * padding)),
    ↳(activation.shape[2] + (2 * padding)))
index_matrix[: (activation.shape[1] + (2 * padding)) - (window_size - 1), :
    ↳(activation.shape[2] + (2 * padding)) - (window_size - 1)] = 0
inv_identity = np.delete(inv_identity, np.unique(index_matrix)[1:], 0) # delete
    ↳second row of A

zero_loc = np.where(inv_identity == 0)
set_zero = (zero_loc[0], zero_loc[1] + padding, zero_loc[2])
inv_identity[set_zero] = 0

inv_identity = inv_identity[:, padding:activation.shape[1] + padding, padding:
    ↳activation.shape[2] + padding]
inv_identity = np.delete(inv_identity, np.where(np.sum(1 - inv_identity,
    ↳axis=(1, 2)) == 0)[0], 0) # delete second row of A
identity = 1 - inv_identity

activation_tensor = activation * inv_identity[..., np.newaxis]
prediction = classifier_model(activation_tensor)

values = prediction[:, cls].numpy()[:, np.newaxis, np.newaxis]
values = identity * values
values = values.sum(axis=0) / identity.sum(axis=0)
values2 = values

# reverse ablation box (preservation perspective)
inv_identity, identity = identity, inv_identity

activation_tensor = activation * inv_identity[..., np.newaxis]
prediction = classifier_model(activation_tensor)

values = prediction[:, cls].numpy()[:, np.newaxis, np.newaxis]
values = identity * values
values = values.sum(axis=0) / identity.sum(axis=0)
reverse_values2 = values

## window_size = 1 X 2
# ablation box (deletion perspective)
window_size = 2 ; padding = 1
inv_identity = (1 - np.identity((last_layer_activation.shape[0] + (2 * padding)),
    ↳* (last_layer_activation.shape[1] + (2 * padding))))

```

```

inv_identity = inv_identity.reshape((last_layer_activation.shape[0] + (2 *
    ↳padding)) * (last_layer_activation.shape[1] + (2 * padding)),
    ↳(last_layer_activation.shape[0] + (2 * padding)), (last_layer_activation.
    ↳shape[1] + (2 * padding)))

index_matrix = np.arange((activation.shape[1] + (2 * padding)) * (activation.
    ↳shape[2] + (2 * padding))).reshape((activation.shape[1] + (2 * padding)),
    ↳(activation.shape[2] + (2 * padding)))
index_matrix[:, (activation.shape[1] + (2 * padding)) - (window_size - 1), :
    ↳ (activation.shape[2] + (2 * padding)) - (window_size - 1)] = 0
inv_identity = np.delete(inv_identity, np.unique(index_matrix)[1:], 0) # delete
    ↳second row of A

zero_loc = np.where(inv_identity == 0)
set_zero = (zero_loc[0], zero_loc[1], zero_loc[2] + padding)
inv_identity[set_zero] = 0

inv_identity = inv_identity[:, padding:activation.shape[1] + padding, padding:
    ↳activation.shape[2] + padding]
inv_identity = np.delete(inv_identity, np.where(np.sum(1 - inv_identity,
    ↳axis=(1, 2)) == 0)[0], 0) # delete second row of A
identity = 1 - inv_identity

activation_tensor = activation * inv_identity[..., np.newaxis]
prediction = classifier_model(activation_tensor)

values = prediction[:, cls].numpy()[:, np.newaxis, np.newaxis]
values = identity * values
values = values.sum(axis=0) / identity.sum(axis=0)
values3 = values

# reverse ablation box (preservation perspective)
inv_identity, identity = identity, inv_identity

activation_tensor = activation * inv_identity[..., np.newaxis]
prediction = classifier_model(activation_tensor)

values = prediction[:, cls].numpy()[:, np.newaxis, np.newaxis]
values = identity * values
values = values.sum(axis=0) / identity.sum(axis=0)
reverse_values3 = values

## window_size = 2 X 2
# ablation box (deletion perspective)
window_size = 2 ; padding = 1

```

```

inv_identity = (1 - np.identity((last_layer_activation.shape[0] + (2 * padding))
    ↳ * (last_layer_activation.shape[1] + (2 * padding))))
inv_identity = inv_identity.reshape((last_layer_activation.shape[0] + (2 *
    ↳ padding)) * (last_layer_activation.shape[1] + (2 * padding)),
    ↳ (last_layer_activation.shape[0] + (2 * padding)), (last_layer_activation.
    ↳ shape[1] + (2 * padding)))

index_matrix = np.arange((activation.shape[1] + (2 * padding)) * (activation.
    ↳ shape[2] + (2 * padding))).reshape((activation.shape[1] + (2 * padding)),
    ↳ (activation.shape[2] + (2 * padding)))
index_matrix[:, (activation.shape[1] + (2 * padding)) - (window_size - 1), :
    ↳ (activation.shape[2] + (2 * padding)) - (window_size - 1)] = 0
inv_identity = np.delete(inv_identity, np.unique(index_matrix)[1:], 0) # delete
    ↳ second row of A

zero_loc = np.where(inv_identity == 0)
for p, q in list(combinations_with_replacement(range(window_size), 2))[1:]:
    set_zero = (zero_loc[0], zero_loc[1] + p, zero_loc[2] + q)
    inv_identity[set_zero] = 0
    if p != q:
        set_zero = (zero_loc[0], zero_loc[1] + q, zero_loc[2] + p)
        inv_identity[set_zero] = 0

inv_identity = inv_identity[:, padding:activation.shape[1] + padding, padding:
    ↳ activation.shape[2] + padding]
identity = 1 - inv_identity

activation_tensor = activation * inv_identity[..., np.newaxis]
prediction = classifier_model(activation_tensor)

values = prediction[:, cls].numpy()[:, np.newaxis, np.newaxis]
values = identity * values
values = values.sum(axis=0) / identity.sum(axis=0)
values4 = values

# reverse ablation box (preservation perspective)
inv_identity, identity = identity, inv_identity

activation_tensor = activation * inv_identity[..., np.newaxis]
prediction = classifier_model(activation_tensor)

values = prediction[:, cls].numpy()[:, np.newaxis, np.newaxis]
values = identity * values
values = values.sum(axis=0) / identity.sum(axis=0)
reverse_values4 = values

```

```

## average over all ablation boxes of each perspective
values = (values1 + values2 + values3 + values4) / 4
reverse_values = (reverse_values1 + reverse_values2 + reverse_values3 +
→reverse_values4) / 4

## weight ratio
aero = preds.numpy()[:, cls][:, np.newaxis]
weight_ratio = ((aero - values) / aero)

## reverse weight ratio
zero_tensor = np.zeros(last_conv_layer_output.shape)
reverse_preds = classifier_model(zero_tensor)

reverse_aero = reverse_preds.numpy()[:, cls][:, np.newaxis]
reverse_weight_ratio = ((reverse_values - reverse_aero) / reverse_aero)

## heatmap
heatmap = weight_ratio * reverse_weight_ratio
heatmap = np.maximum(heatmap, 0) / np.max(heatmap)

```

## 1.5 Generate visual explanation map of Pixab-CAM

```

[8]: salience = skimage.transform.resize(heatmap, (299, 299))
plt.figure(1)
skimage.io.imshow(Xi/2 + 0.5)
plt.imshow(salience, cmap="jet", alpha=0.75)
plt.axis('off')
plt.show()

```

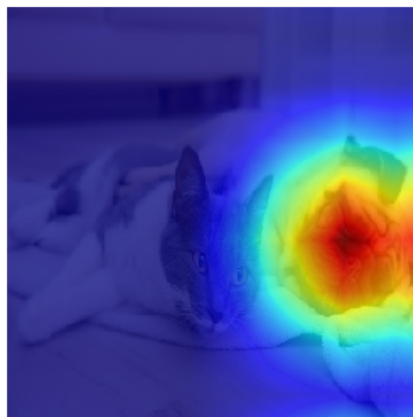

Supplement: supplementary_material [file attachment]
